# Supplementary material for: Visible-light persulfate activation by a BiOI/BiOCOOH composite photocatalyst for accelerated organic pollutant degradation
Source: Royal Society of Chemistry journal article supplement (doi:10.1039/d3nj02323k), 2023-01-01
Supplement: d3nj02323k1.pdf [file d3nj02323k1.pdf]

## Supporting Information

### **Visible-light persulfate activation by a BiOI/BiOCCOOH composite photocatalyst for accelerated organic pollutant degradation**

Yanan Duan, Jianjiang Lu\*, Yujun Yan\*, Yanbin Tong, Yalong Song, Jinfeng Xiao

School of Chemistry and Chemical Engineering/Key Laboratory of Environmental  
Monitoring and Pollutant Control, Shihezi University, Shihezi 832003, China

\*Corresponding author.

E-mail address: lujianjiang2021@163.com (J.J Lu), yyj\_tea@shzu.edu.cn (Y.J Yan).

**Text:S1** LC-MS test conditions

The CIP degradation intermediates were determined using a liquid-mass combination instrument (agilent 1100 + thermos TSQ quantum Ultra AM). The electrospray ionization source (ESI) worked in positive ion mode, in which the capillary voltage was set at 3.0 kV, the desolubilization temperature was 350°C, and the desolubilization gas was nitrogen. MS spectrum was obtained by full scan mode ( $m/z$  50-700). The compounds were isolated using a welch ultimate XB-C18 column (2.1 × 100 mm, 3 μm). Mobile phase: A 0.1% formic acid water, B acetonitrile. The gradient elution conditions were 0 min and 95% A was maintained. 0-9 min, A decreased from 95% to 7%; 9-10.5 min, A remained at 7%. After 10.5 min, A linearly increased to 95%. The flow rate was 0.3 ml/min and the sample volume was 10 μL.

**Table S1** Structural parameters of the samples

| Sample | $S_{\text{BET}}$ (m <sup>2</sup> /g) | Pore volume (cm <sup>3</sup> /g) | Mean pore diameter (nm) |
|--------|--------------------------------------|----------------------------------|-------------------------|
| BOI    | 15.854                               | 0.0849                           | 26.024                  |
| BOCH   | 12.537                               | 0.0618                           | 16.455                  |
| 0.5 IB | 33.162                               | 0.1709                           | 18.761                  |

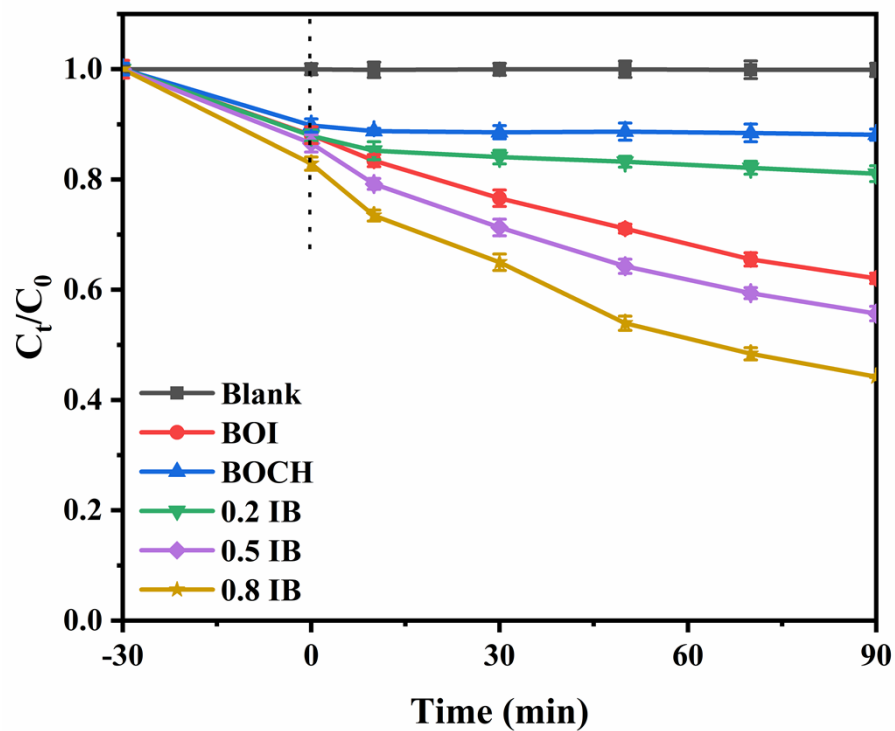

Fig S1 Photocatalytic degradation of CIP in different samples.

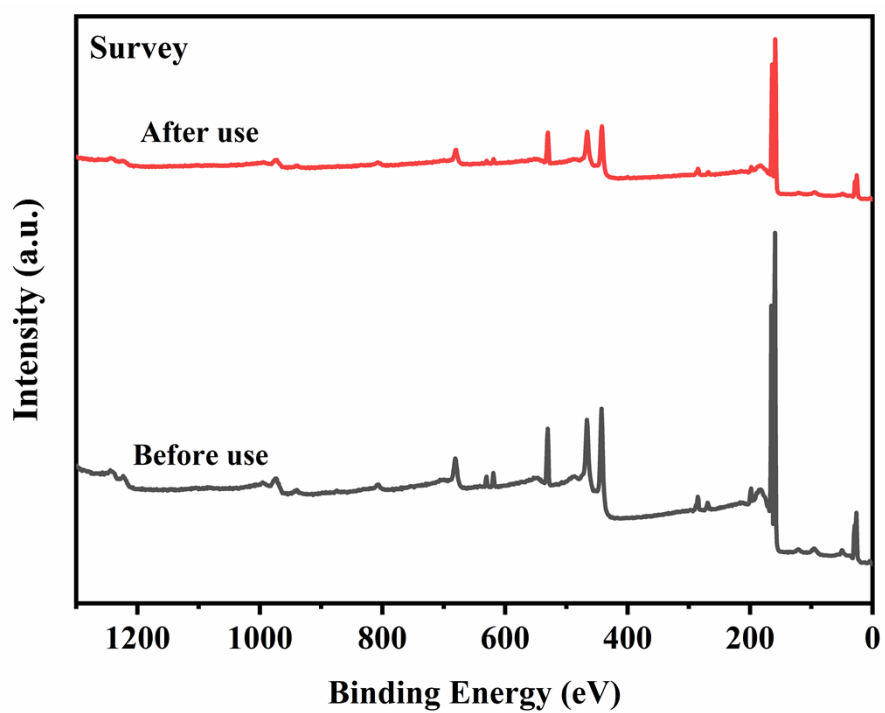

Fig.S2 XPS spectrum before and after cycling.

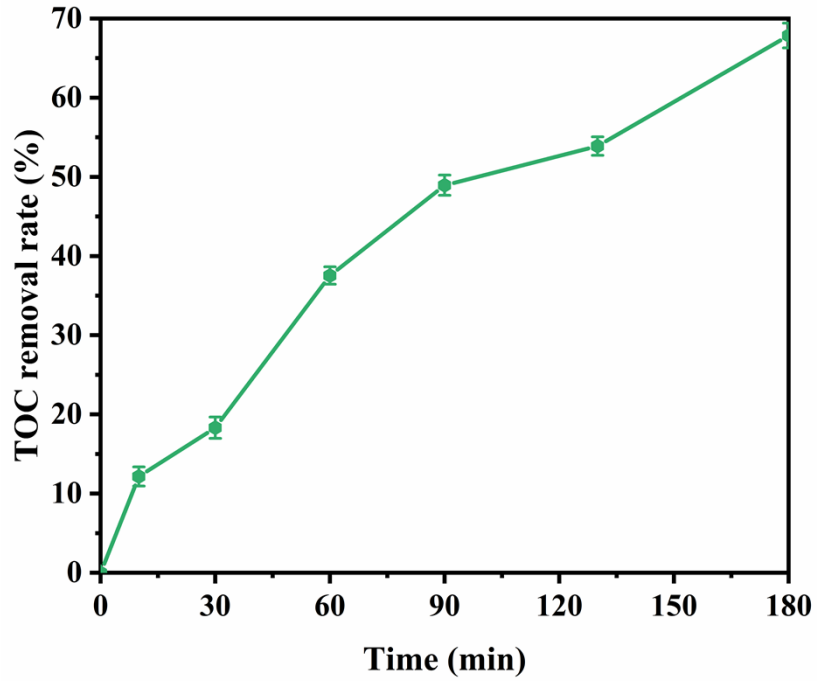

**Fig. S3** TOC removal efficiency during CIP degradation by 0.5 IB/PS system.

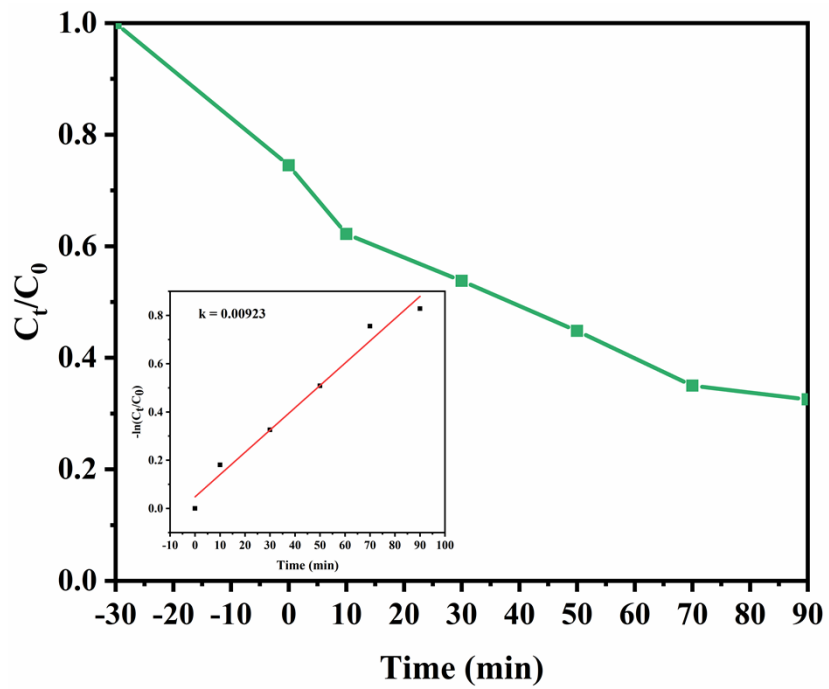

**Fig. S4** Degradation curve and pseudo-first order kinetic curve of NBT in 0.5 IB/PS system under visible light.

**Table.S2** Comparison of the results of this study with those of previous studies.

| Sample                                                                             | C <sub>0</sub>        | Parameters                                   | Degradation rate                                      | References       |
|------------------------------------------------------------------------------------|-----------------------|----------------------------------------------|-------------------------------------------------------|------------------|
| CuS/Fe <sub>2</sub> O <sub>3</sub> /Mn <sub>2</sub> O <sub>3</sub>                 | (CIP) 0.2 g/L         | catalyst (0.6 g/L); PMS (0.6 g/L); pH (5.84) | 88% (120 min)                                         | 1                |
| 2 wt% CQDs/BiOCCOOH                                                                | (RhB) 4 mg/L          | catalyst (0.6 g/L); pH (7)                   | 73% (60 min)                                          | 2                |
| 3% RP/BP/BiOCCOOH                                                                  | (TC-HCl) 20 mg/L      | catalyst (0.4 g/L)                           | 60.5% (120 min)                                       | 3                |
| (BiOCCOOH) <sub>0.25</sub> (Bi <sub>2</sub> MoO <sub>6</sub> ) <sub>0.75</sub> -US | (TC-HCl) 35 mg/L      | catalyst (1 g/L)                             | 82.2% (180 min)                                       | 4                |
| 0.5 g-C <sub>3</sub> N <sub>4</sub> /BiOCCOOH                                      | (CIP) 10 mg/L         | catalyst (0.3 g/L)                           | 72.1% (120 min)                                       | 5                |
| BiOI/Fe <sub>3</sub> O <sub>4</sub> (5:1)                                          | (RhB) 20 mg/L         | catalyst (0.5 g/L); PS (1 mM); pH (4.6)      | 98.4% (30 min)                                        | 6                |
| g-C <sub>3</sub> N <sub>4</sub> /Ag <sub>2</sub> CrO <sub>4</sub>                  | (RhB; MB) 10 mg/L     | catalyst (0.67 g/L)                          | 99.2% (90 min)<br>99.1% (120 min)                     | 7                |
| rGO-BiVO <sub>4</sub> -ZnO                                                         | (CIP) 10 mg/L         | catalyst (0.2 g/L); PMS (0.5 g/L)            | 98.4%(60 min)                                         | 8                |
| TiO <sub>2</sub> /γ-Fe <sub>2</sub> O <sub>3</sub> /GO                             | (CIP) 10 mg/L         | catalyst (0.4 g/L); pH (6.6)                 | 99% (140 min)                                         | 9                |
| Cu <sub>0.84</sub> Bi <sub>2.08</sub> O <sub>4</sub>                               | (CIP) 40 mg/L         | catalyst (1 g/L); PS (4 mM)                  | >90% (400 min)                                        | 10               |
| Mn <sub>3</sub> O <sub>4</sub> -MnO <sub>2</sub>                                   | (CIP) 16.6 mg/L       | catalyst (0.1 g/L); PMS (1 mM)               | 97.6% (25 min)                                        | 11               |
| 0.5 BiOI/BiOCCOOH                                                                  | (CIP; TC RhB) 10 mg/L | catalyst (0.6 g/L); PS (1 mM); pH (7.3)      | 95.1% (90 min);<br>83.17% (60 min);<br>92.23% (5 min) | <b>This work</b> |

**Table S3** Properties of intermediates that may be formed during CIP degradation

| Compound | m/z    | Formula                                                        | Proposed structure |
|----------|--------|----------------------------------------------------------------|--------------------|
| CIP      | 331.96 | C <sub>17</sub> H <sub>18</sub> FN <sub>3</sub> O <sub>3</sub> |                    |
| P1       | 344.8  | C <sub>17</sub> H <sub>19</sub> N <sub>3</sub> O <sub>5</sub>  |                    |
| P2       | 361.94 | C <sub>17</sub> H <sub>19</sub> N <sub>3</sub> O <sub>6</sub>  |                    |

|            |        |                       |  |
|------------|--------|-----------------------|--|
| <b>P3</b>  | 333.84 | $C_{16}H_{19}N_3O_5$  |  |
| <b>P4</b>  | 333.84 | $C_{16}H_{19}N_3O_5$  |  |
| <b>P5</b>  | 361.94 | $C_{17}H_{16}FN_3O_5$ |  |
| <b>P6</b>  | 333.84 | $C_{16}H_{16}FN_3O_4$ |  |
| <b>P7</b>  | 333.84 | $C_{16}H_{16}FN_3O_4$ |  |
| <b>P8</b>  | 316    | $C_{16}H_{17}N_3O_4$  |  |
| <b>P9</b>  | 316    | $C_{16}H_{17}N_3O_4$  |  |
| <b>P10</b> | 305.95 | $C_{15}H_{16}FN_3O_3$ |  |
| <b>P11</b> | 290.10 | $C_{14}H_{11}FN_2O_4$ |  |
| <b>P12</b> | 226.78 | $C_{10}H_7FN_2O_3$    |  |
| <b>P13</b> | 200.09 | $C_8H_7FN_2O_3$       |  |

|     |        |                                                                |                                                                                       |
|-----|--------|----------------------------------------------------------------|---------------------------------------------------------------------------------------|
| P14 | 110.92 | C <sub>6</sub> H <sub>6</sub> FN                               | 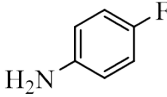   |
| P15 | 94.65  | C <sub>6</sub> H <sub>5</sub> F                                |    |
| P16 | 262.06 | C <sub>13</sub> H <sub>11</sub> FN <sub>2</sub> O <sub>3</sub> |     |
| P17 | 243.04 | C <sub>13</sub> H <sub>12</sub> N <sub>2</sub> O <sub>3</sub>  |     |
| P18 | 274.09 | C <sub>13</sub> H <sub>10</sub> N <sub>2</sub> O <sub>5</sub>  |     |
| P19 | 218.05 | C <sub>12</sub> H <sub>11</sub> FN <sub>2</sub> O              |   |
| P20 | 200.09 | C <sub>12</sub> H <sub>12</sub> N <sub>2</sub> O               |  |
| P21 | 130.1  | C <sub>9</sub> H <sub>9</sub> N                                |  |
| P22 | 340.14 | C <sub>14</sub> H <sub>14</sub> FN <sub>3</sub> O <sub>6</sub> |   |

1. Y. Huang, L.-c. Nengzi, X. Zhang, J. Gou, Y. Gao, G. Zhu, Q. Cheng and X. Cheng, *Chem. Eng. J.*, 2020, **388**, 124274.
2. P. Chen, Q. Zhang, Y. Su, L. Shen, F. Wang, H. Liu, Y. Liu, Z. Cai, W. Lv and G. Liu, *Chem. Eng. J.*, 2018, **332**, 737-748.
3. G. Xu, C. Ma, J. Wei, X. Yang, T. Wang, C. Tan, K. Yang, K. Jiang, G. Yu, C. Zhang and X. Li, *Chemosphere*, 2022, **300**, 134485.
4. M. Mohammadzadeh, M. Haghghi and M. Shabani, *Chem. Eng. J.*, 2021, **419**, 129516.
5. H. Liu, H. Zhang, M. Chen, C. Zhang, C. Du, J. Peng and K. Jiang, *J. Water Process. Eng.*, 2020, **38**, 101580.

6. Y. Liu, H. Guo, Y. Zhang, X. Cheng, P. Zhou, G. Zhang, J. Wang, P. Tang, T. Ke and W. Li, *Sep. Purif. Technol.*, 2018, **192**, 88-98.
7. Y. Shang, X. Chen, W. Liu, P. Tan, H. Chen, L. Wu, C. Ma, X. Xiong and J. Pan, *Appl. Catal. B: Environ.*, 2017, **204**, 78-88.
8. A. Raja, P. Rajasekaran, K. Selvakumar, M. Arunpandian, K. Kaviyarasu, S. Asath Bahadur and M. Swaminathan, *Sep. Purif. Technol.*, 2020, **233**, 115996.
9. F. Wang, X. Yu, M. Ge and S. Wu, *Chem. Eng. J.*, 2020, **384**, 123381.
10. H. Tang, Z. Dai, X. Xie, Z. Wen and R. Chen, *Chem. Eng. J.*, 2019, **356**, 472-482.
11. Z. Zhao, J. Zhao and C. Yang, *Chem. Eng. J.*, 2017, **327**, 481-489.
